# Supplementary material
Source: MDPI journal article supplement (https://www.mdpi.com/2073-4344/13/9/1260)
Supplement: s1 [file s1]

Supporting Information

# Boosting the Photoreactivity of g-C<sub>3</sub>N<sub>4</sub> towards CO<sub>2</sub> Reduction by Polymerization of Dicyandiamide in Ammonium Chloride

Zhi Wang <sup>1</sup>, Shixin Chang <sup>1</sup>, Mengxue Yu <sup>1</sup>, Zaiwang Zhao <sup>2,\*</sup>, Qin Li <sup>1</sup>, Kangle Lv <sup>1,\*</sup>

<sup>1</sup> College of Resources and Environment, South-Central Minzu University, Wuhan 430074, China; wangzhi0030@163.com (Z.W.); csx1335243806@163.com (S.C.); yumengxue1104@163.com (M.X.); li-qin0518@mail.scuec.edu.cn (Q.L.)

<sup>2</sup> College of Energy Materials and Chemistry & College of Chemistry and Chemical Engineering, Inner Mongolia University, Hohhot 010070, China.

\* Correspondence: zwzhao@imu.edu.cn (Z.Z.); lvkangle@mail.scuec.edu.cn (K.L.)

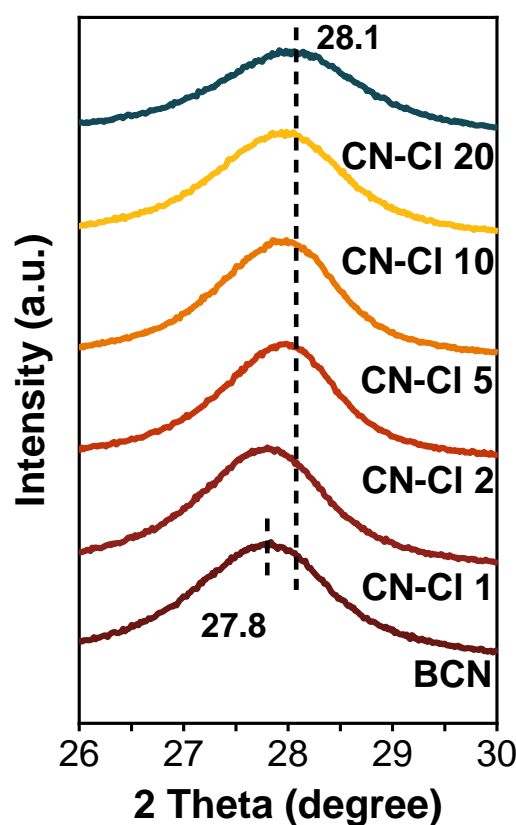

**Figure S1.** XRD patterns of the as-prepared CN samples in diffraction angles of 26° to 30°.

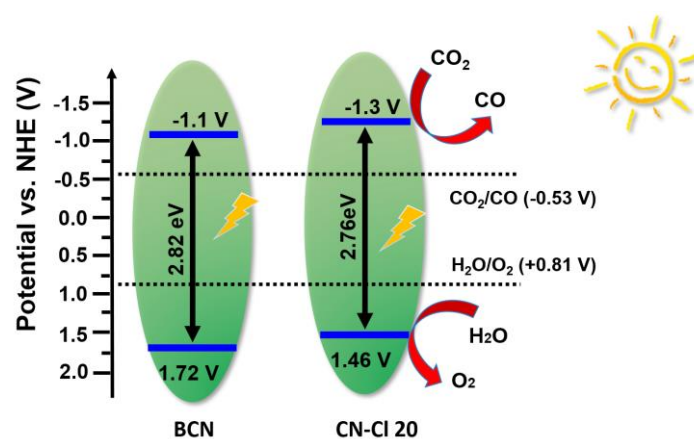

Figure S2. Electronic band structures of NCB and CN-Cl 20 sample.

Table S1. Yields of the products for the synthesis of carbon nitride photocatalysts.

| Sample             | BCN  | CN-Cl 1 | CN-Cl 2 | CN-Cl 5 | CN-Cl 10 | CN-Cl 20 |
|--------------------|------|---------|---------|---------|----------|----------|
| Product weight (g) | 1.72 | 1.83    | 1.92    | 1.87    | 1.95     | 1.89     |
| Yield (%)          | 43   | 45      | 48      | 46      | 48       | 47       |

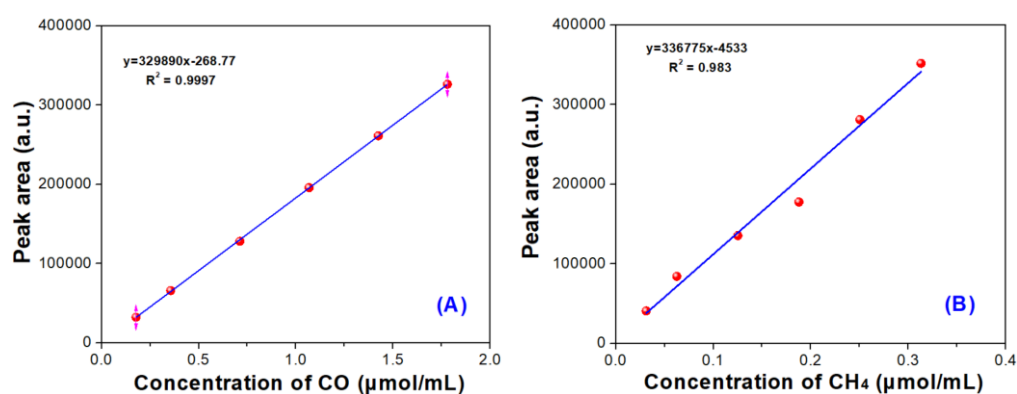

Figure S3. Working curves for CO (A) and CH<sub>4</sub> (B), respectively.

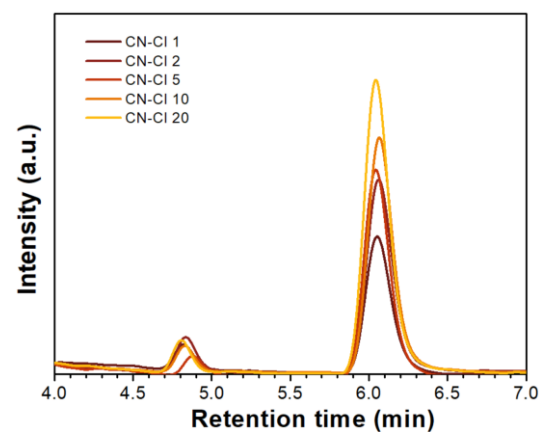

Figure S4. Gas chromatograph of photocatalytic CO<sub>2</sub> reduction..

**Table S2.** Comparison of the reaction rate for photocatalytic CO<sub>2</sub> reduction.

| Photocatalysts | $S_{CO}^a$ | $R_{CO}$ ( $\mu\text{mol h}^{-1} \text{g}^{-1}$ ) | $S_{CH_4}^b$ | $R_{CH_4}$ ( $\mu\text{mol h}^{-1} \text{g}^{-1}$ ) |
|----------------|------------|---------------------------------------------------|--------------|-----------------------------------------------------|
| BCN            | 61446      | 16.5                                              | 11235        | 5.13                                                |
| CN-Cl 1        | 73362      | 19.7                                              | 13094        | 5.99                                                |
| CN-Cl 2        | 90122      | 24.2                                              | 12788        | 5.85                                                |
| CN-Cl 5        | 126243     | 33.9                                              | 11891        | 5.44                                                |
| CN-Cl 10       | 145981     | 39.2                                              | 14711        | 6.73                                                |
| CN-Cl 20       | 188438     | 50.6                                              | 14321        | 6.55                                                |

<sup>a</sup> Peak area of the detected CO; <sup>b</sup> Peak area of the detected CH<sub>4</sub>.

Note: Calculation of the production of CO and CH<sub>4</sub> are based on the following equations :

$$CO \text{ production rate} = \frac{\left(\frac{CO \text{ peak area}}{\text{slope}}\right)}{\text{Reaction time} * \text{Catalyst mass}} \quad (\text{equation S1})$$

$$CH_4 \text{ production rate} = \frac{\left(\frac{CH_4 \text{ peak area}}{\text{slope}}\right)}{\text{Reaction time} * \text{Catalyst mass}} \quad (\text{equation S2})$$
